# Supplementary material for: Exploiting the role of stereoelectronic effects to design the antagonists of the human complement C3a receptor
Source: Royal Society of Chemistry journal article supplement (doi:10.1039/d1nj00730k), 2021-01-01
Supplement: d1nj00730k1.pdf [file d1nj00730k1.pdf]

Supporting Information:

**Exploiting the role of stereoelectronic effects to design the antagonists of human complement C3a receptor.**

Sana Jindani<sup>†,§</sup> and Bishwajit Ganguly<sup>\*,†,§</sup>

<sup>†</sup> Computation and Simulation Unit (Analytical Discipline and Centralized Instrument Facility), CSIR–Central Salt and Marine Chemicals Research Institute, Bhavnagar 364002, Gujarat, India

<sup>§</sup> Academy of Scientific and Innovative Research (AcSIR), Ghaziabad, 201002, Uttar Pradesh, India

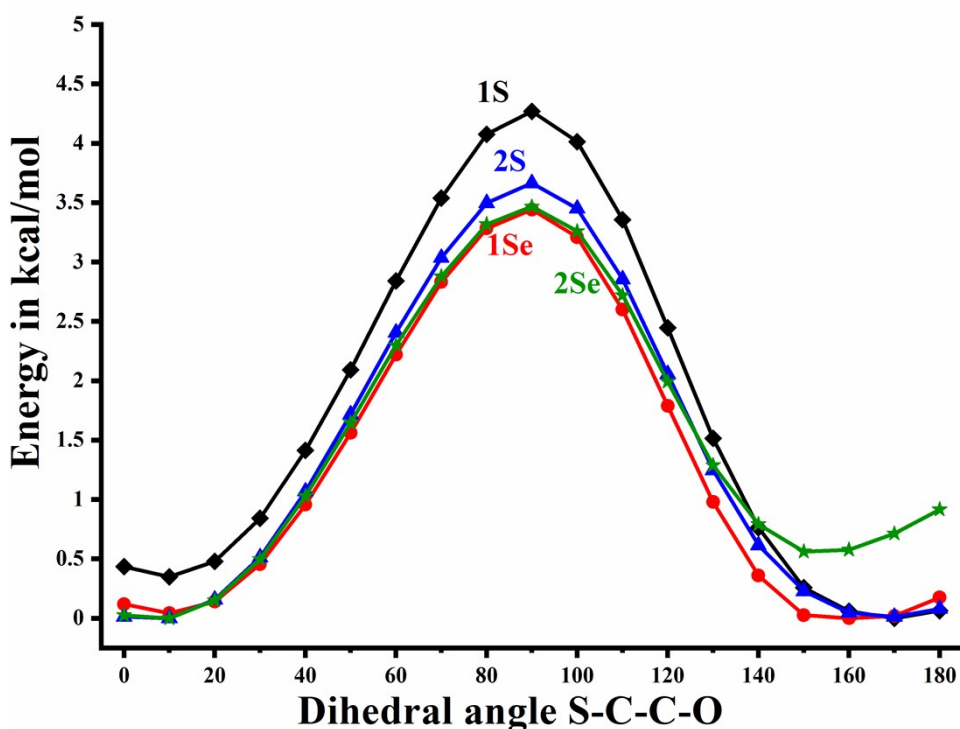

**Figure S1:** Variation in energy with dihedral angle X–C–C–O (X = S, Se) reveals barriers to rotation from low energy conformations. **1S** (black) shows preferred dihedral angle 180°, **1Se** (red), **2S** (blue) shows no preference, and **2Se** (green) shows preference for 0°.

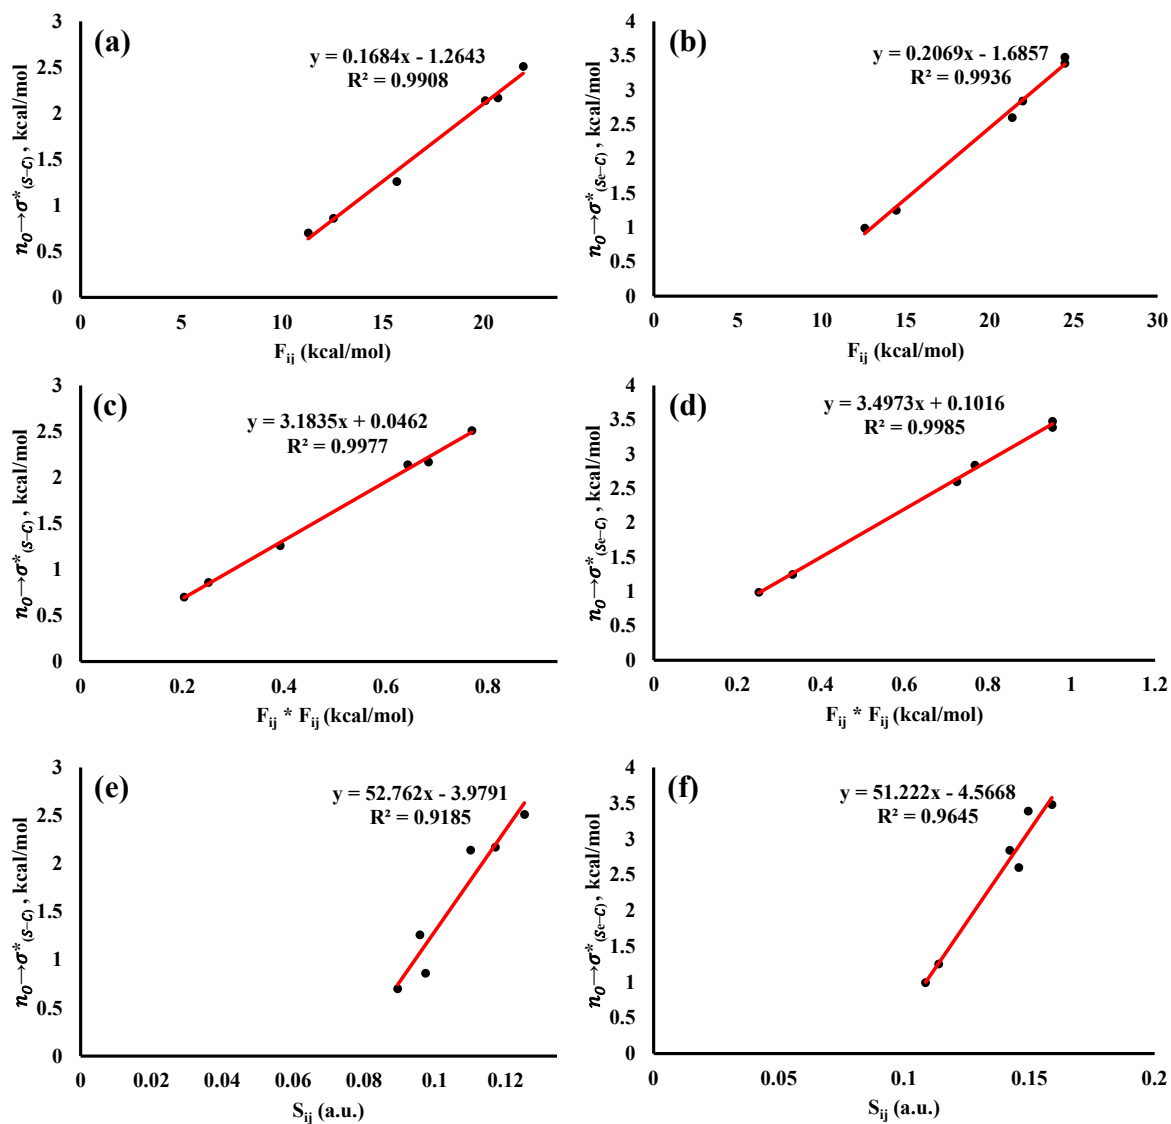

**Figure S2:** Correlations of energies of interactions a)  $n_{O \rightarrow \sigma^* C-S}$  with the corresponding Fock matrix elements ( $F_{ij}$ ). b)  $n_{O \rightarrow \sigma^* C-Se}$  with the corresponding Fock matrix elements ( $F_{ij}$ ). c)  $n_{O \rightarrow \sigma^* C-S}$  with the square of corresponding Fock matrix elements ( $F_{ij} * F_{ij}$ ). d)  $n_{O \rightarrow \sigma^* C-Se}$  with the the square of corresponding Fock matrix elements ( $F_{ij} * F_{ij}$ ). e)  $n_{O \rightarrow \sigma^* C-S}$  with the corresponding overlap matrix elements ( $S_{ij}$ ). f)  $n_{O \rightarrow \sigma^* C-Se}$  with the corresponding overlap matrix elements ( $S_{ij}$ ).

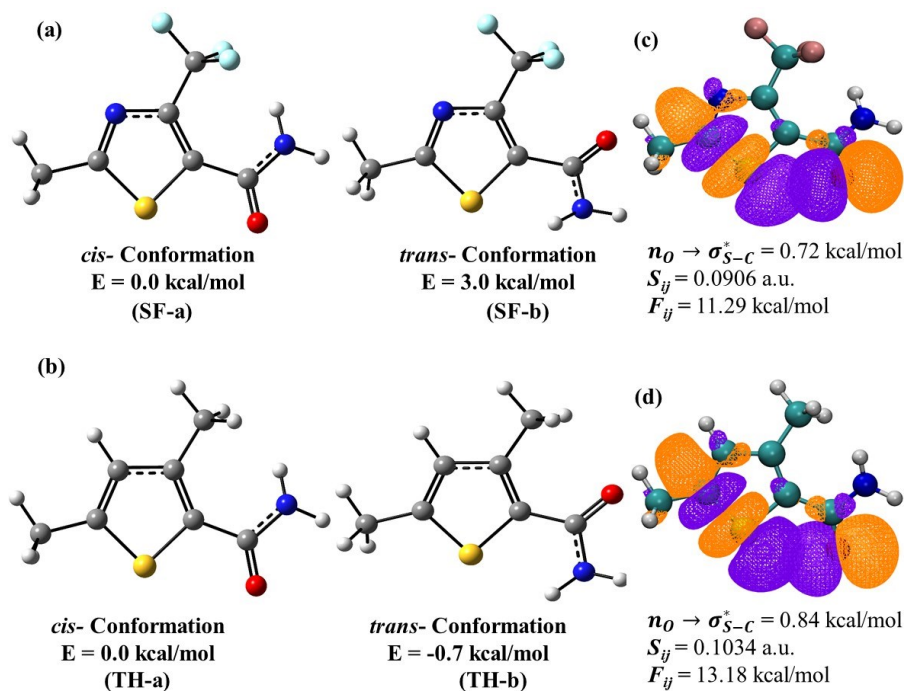

**Figure S3:** The geometries of cis and trans conformation and electronic energies of (a) 2-methyl-4-(trifluoromethyl)thiazole-5-carboxamide (SF) and (b) 3,5-dimethylthiophene-2-carboxamide (TH) and orbital overlapping ( $n_O \rightarrow \sigma_{S-C}^*$ ) of (c) SF-a and (d) TH-a.

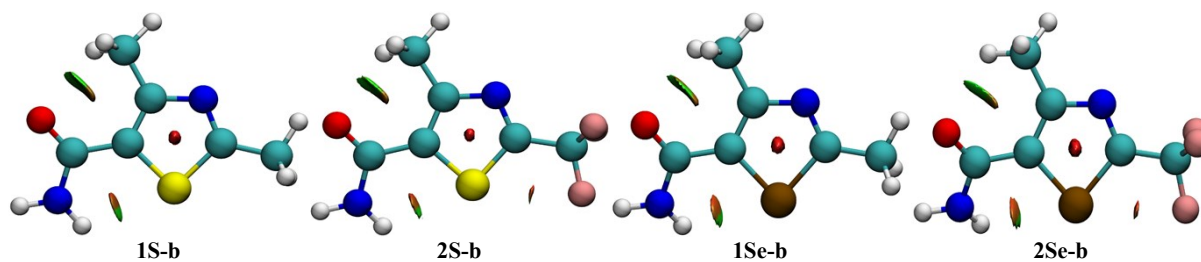

**Figure S4:** NCI plots showing the non-covalent van der Waals interaction between thiazole/selenazole ring and the amide moiety using the color-filled RDG iso-surface. The green and light brown color represents van der Waals (vdW), and red color represents ring current.

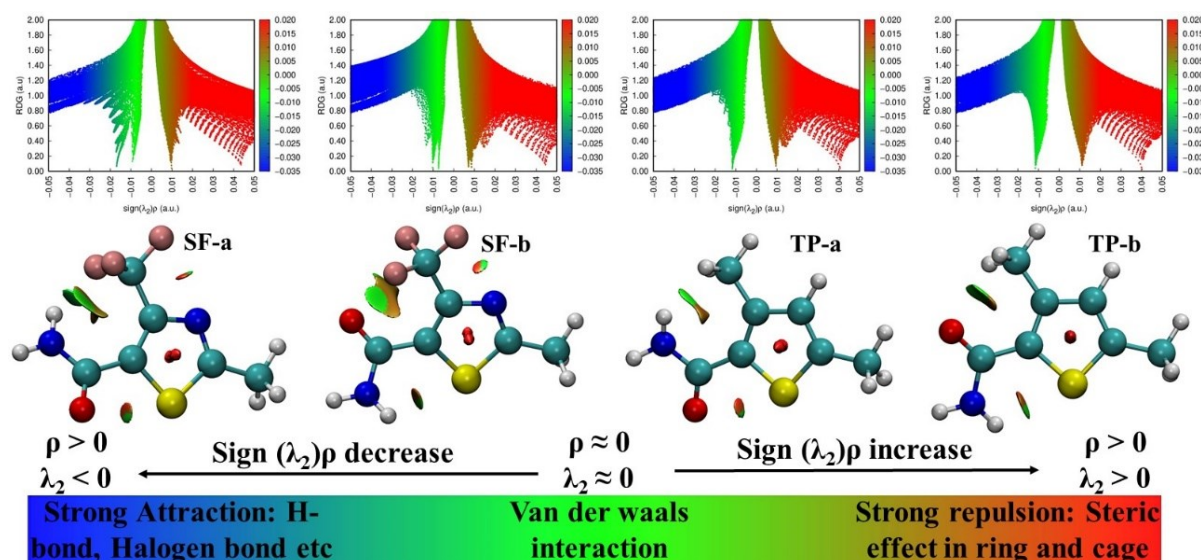

**Figure S5:** NCI plots showing the non-covalent van der Waals interaction between thiazole and thiophene rings and the amide moiety using the color-filled RDG iso-surface as well as scatter graph. The blue, green, and red circles represent hydrogen (H) bond, van der Waals (VdW), and steric repulsive interactions, respectively. (C-cyan, N-blue, O-red, S-yellow, Se-brown, H-white, F-pink)

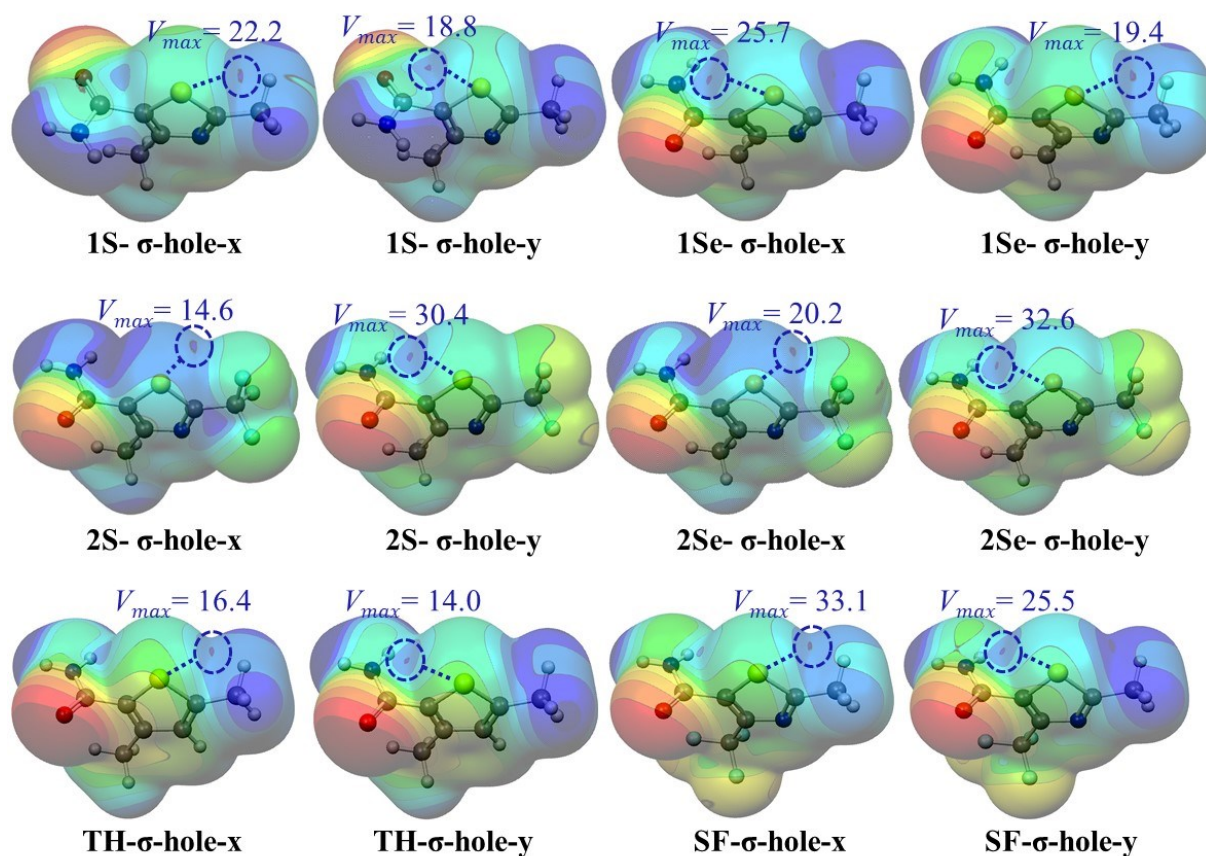

**Figure S6:** Molecular electrostatic potential (MESP) surface computed at the CBS-QB3 method showing the locations of the  $\sigma$ -Holes at 0.001 a.u. isodensity surface.  $V_{max}$  values are in kcal/mol unit. Minimum potential kept constant in all the structures at -37.65 kcal/mol. Blue and light blue colors indicate the positive potential, and green, yellow and red color indicate the negative potentials.

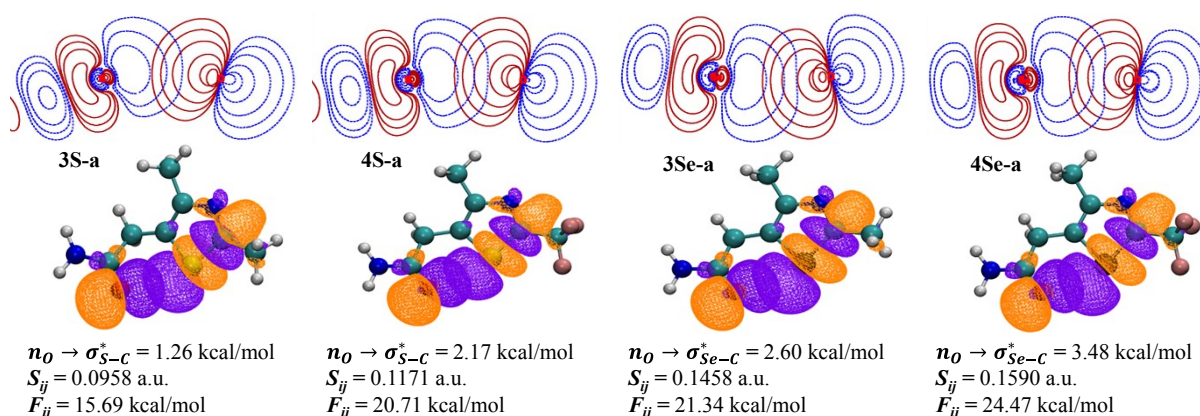

**Figure S7:**  $n$  to  $\sigma^*$  interaction between  $n_O$  of amide group and  $\sigma^*$  orbital of C-X bond in 3S-a, 4S-a, 3Se-1, 4Se-a. The top diagram of each scaffold shows contour lines and 3D visualize the orbital overlap of the same interaction along with the interaction energy, overlap and fock matrix elements mentioned at the bottom of the structures.



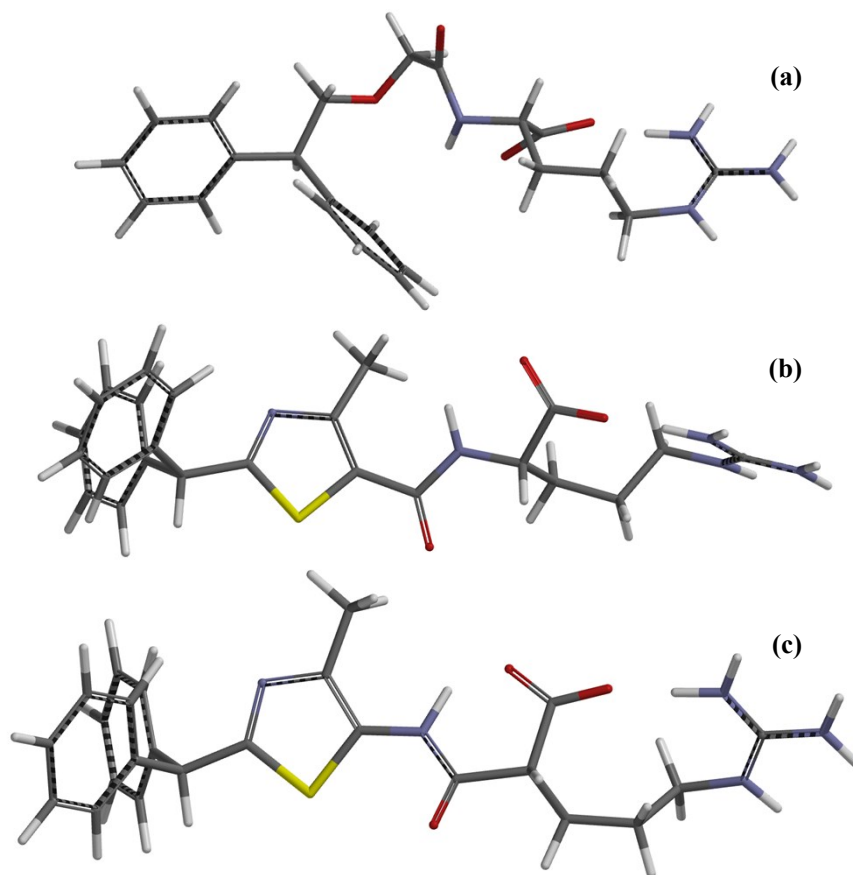

Figure S8: Minimized geometries of a) SB290157 b) L-1 c) L-2 at Merck Molecular Force Field (MMFF).

**Coordinates:**

**1S-a**

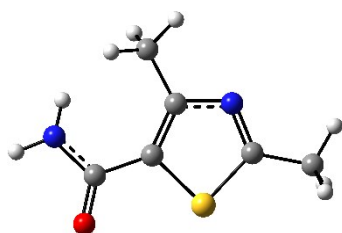

**Electronic Energy: -815.0962211 a.u.**

|   |             |             |             |
|---|-------------|-------------|-------------|
| C | -0.51730000 | -0.10150400 | -0.00072600 |
| C | 0.03139500  | 1.16246900  | 0.04249400  |
| C | 1.92354600  | -0.00167600 | -0.01901900 |
| S | 0.75561100  | -1.28769400 | -0.03708800 |
| N | 1.40483300  | 1.19628000  | 0.02869600  |
| C | -1.90659100 | -0.61758900 | 0.01445300  |
| O | -2.14201100 | -1.79732300 | 0.22160900  |
| N | -2.91093400 | 0.29694100  | -0.19176800 |
| H | -2.72874300 | 1.16696600  | -0.66309100 |
| H | -3.83409300 | -0.09733600 | -0.29402100 |
| C | 3.39820100  | -0.26079400 | -0.05003700 |
| C | -0.69259500 | 2.47726200  | 0.12462800  |
| H | -0.01008200 | 3.22773800  | 0.52249600  |

**1S-b**

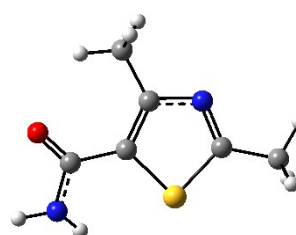

**Electronic Energy: -815.0963456 a.u.**

|   |             |             |             |
|---|-------------|-------------|-------------|
| C | -0.53223600 | -0.05171700 | 0.02191400  |
| C | 0.07306200  | 1.18286300  | -0.05570600 |
| C | 1.92704200  | -0.05299400 | -0.00124400 |
| S | 0.69902900  | -1.29229200 | 0.09757700  |
| N | 1.44974400  | 1.15351600  | -0.07179100 |
| C | -1.98646600 | -0.35357500 | 0.04357000  |
| O | -2.82818900 | 0.48743700  | 0.31221500  |
| N | -2.32980100 | -1.65668300 | -0.22870200 |
| H | -1.70939600 | -2.26115500 | -0.74293300 |
| H | -3.31893800 | -1.83948600 | -0.30519900 |
| C | 3.38777000  | -0.37947800 | 0.01826300  |
| C | -0.60115400 | 2.51774800  | -0.12521200 |

|   |             |             |             |
|---|-------------|-------------|-------------|
| H | -1.01089300 | 2.82247000  | -0.86668700 |
| H | -1.57241800 | 2.42081300  | 0.76788800  |
| H | 3.71336000  | -0.88254400 | 0.79210000  |
| H | 3.69355200  | -0.77324500 | -0.96974800 |
| H | 3.91839300  | 0.69527100  | 0.00234200  |

### 2S-a

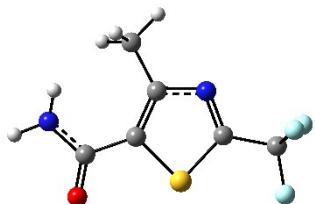

**Electronic Energy: -1112.4882609 a.u.**

|   |             |             |             |
|---|-------------|-------------|-------------|
| C | 1.38217100  | -0.08752500 | 0.00320700  |
| C | 0.90154900  | 1.20883800  | 0.04798400  |
| C | -1.01472500 | 0.12609500  | 0.00284000  |
| S | 0.06601300  | -1.21443700 | -0.02260000 |
| N | -0.46437400 | 1.30528700  | 0.04460500  |
| C | 2.74620300  | -0.68231200 | 0.00863000  |
| O | 2.90429700  | -1.87435200 | 0.21160500  |
| N | 3.79438900  | 0.17176500  | -0.20277000 |
| H | 3.66296500  | 1.07192100  | -0.63170800 |
| H | 4.70077100  | -0.26187200 | -0.29388600 |
| C | -2.51088600 | -0.05177600 | -0.01737100 |
| C | 1.69450100  | 2.48294100  | 0.11866100  |
| H | 1.04612200  | 3.27897500  | 0.48260400  |
| H | 2.55254800  | 2.39223400  | 0.78719900  |
| H | 2.05583700  | 2.78492400  | -0.87147500 |
| F | -2.83127300 | -1.36424600 | -0.03418500 |
| F | -3.05926900 | 0.51622600  | -1.10439300 |
| F | -3.08854700 | 0.49720700  | 1.06296500  |

|   |             |             |             |
|---|-------------|-------------|-------------|
| H | -0.44640200 | 3.05504700  | 0.81615600  |
| H | -0.14469800 | 3.11546600  | -0.91792600 |
| H | -1.67104600 | 2.41698000  | -0.28568200 |
| H | 3.67067300  | -0.88657800 | 0.94472300  |
| H | 3.66456600  | -1.02968500 | -0.81589900 |
| H | 3.94856400  | 0.55166000  | -0.05824400 |

### 2S-b

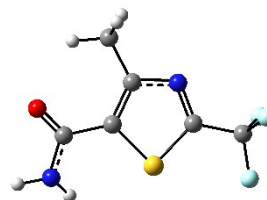

**Electronic Energy: -1112.4878444 a.u.**

|   |             |             |             |
|---|-------------|-------------|-------------|
| C | 1.39456900  | -0.04591900 | -0.01402400 |
| C | 0.88914300  | 1.23775300  | 0.07198100  |
| C | -1.02020900 | 0.13006700  | 0.01144000  |
| S | 0.08804400  | -1.19289800 | -0.09731100 |
| N | -0.48171000 | 1.30614300  | 0.09026800  |
| C | 2.82782100  | -0.45583700 | -0.05291200 |
| O | 3.71161100  | 0.31580500  | -0.37900400 |
| N | 3.08079900  | -1.76485300 | 0.26953200  |
| H | 2.43259700  | -2.30528100 | 0.81946300  |
| H | 4.05399300  | -2.02754300 | 0.31362200  |
| C | -2.51251300 | -0.07959700 | -0.00902600 |
| C | 1.66557000  | 2.51488100  | 0.14428500  |
| H | 1.25120800  | 3.14916000  | 0.93099900  |
| H | 2.72264600  | 2.33030600  | 0.31465100  |
| H | 1.56411400  | 3.05733800  | -0.80088200 |
| F | -2.80177400 | -1.39752200 | -0.09968500 |
| F | -3.09041700 | 0.38935400  | 1.10795900  |
| F | -3.08403800 | 0.53692600  | -1.05470800 |

### 3S-a

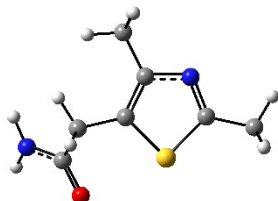

**Electronic Energy: -854.3129731 a.u.**

|   |             |             |             |
|---|-------------|-------------|-------------|
| C | -2.18595100 | -0.37387600 | 0.12751600  |
| C | -0.75619600 | 1.32104500  | -0.02135900 |
| C | 0.11740300  | 0.32114100  | -0.36146500 |
| S | -0.72128400 | -1.20905100 | -0.33223800 |
| N | -2.04495800 | 0.91125300  | 0.25537200  |
| C | 1.56049600  | 0.42269600  | -0.76259500 |
| H | 1.87450300  | 1.46668600  | -0.71094300 |
| H | 1.68820300  | 0.10663000  | -1.80516100 |
| C | 2.49018700  | -0.48048800 | 0.05885400  |
| N | 3.57093900  | 0.14025000  | 0.61095100  |

### 3S-b

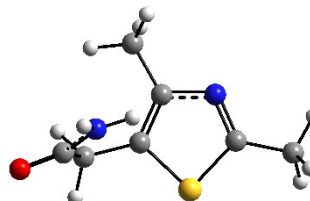

**Electronic Energy: -854.316761 a.u.**

|   |             |             |             |
|---|-------------|-------------|-------------|
| C | -2.24705100 | -0.21466800 | 0.12977500  |
| C | -0.55090200 | 1.19809400  | -0.16276800 |
| C | 0.12070900  | 0.05335100  | -0.50924900 |
| C | 1.54714700  | -0.12632400 | -0.93579200 |
| H | 1.88618800  | 0.75808800  | -1.48260300 |
| H | 1.65016100  | -0.95914100 | -1.63451400 |
| C | 2.61014900  | -0.36992900 | 0.15539800  |
| O | 3.74923600  | -0.66003200 | -0.15197100 |
| N | 2.19764000  | -0.20806600 | 1.44074800  |
| C | -3.62651900 | -0.70024000 | 0.45148600  |

|   |             |             |             |
|---|-------------|-------------|-------------|
| O | 2.28958000  | -1.67390100 | 0.17157200  |
| C | -0.46944800 | 2.79179500  | 0.07280100  |
| C | -3.46931500 | -1.10377100 | 0.38255300  |
| H | -0.68075400 | 3.15300300  | 1.08332400  |
| H | 0.56553100  | 3.03668100  | -0.16896300 |
| H | -1.11931600 | 3.34718700  | -0.60941000 |
| H | -3.77729900 | -1.69316600 | -0.48531400 |
| H | -3.37921900 | -1.78652600 | 1.23230000  |
| H | -4.24435700 | -0.37019800 | 0.60469800  |
| H | 4.20077600  | -0.41390100 | 1.17024800  |
| H | 3.69092300  | 1.13785900  | 0.59036400  |

### 4S-a

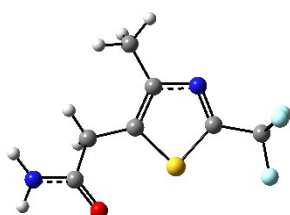

**Electronic Energy: -1151.707232 a.u.**

|   |             |             |             |
|---|-------------|-------------|-------------|
| C | 1.34327900  | 0.14201700  | -0.03512700 |
| C | -0.26189400 | 1.64357400  | 0.00235400  |
| C | -1.03484700 | 0.52492000  | -0.22163500 |
| C | -2.51535600 | 0.48615700  | -0.45957000 |
| H | -2.72401400 | 0.52253600  | -1.53787200 |
| H | -2.96775800 | 1.38414000  | -0.03165500 |
| C | -3.21979100 | -0.77120800 | 0.05890600  |
| O | -2.67188000 | -1.85650700 | 0.09173400  |
| N | -4.51705700 | -0.59099700 | 0.42667800  |
| C | 2.73948000  | -0.40314700 | 0.07856300  |
| C | -0.74696000 | 3.06153200  | 0.10768000  |
| H | -1.73908900 | 3.12869400  | 0.55974200  |
| H | -0.04887600 | 3.63470200  | 0.71823400  |
| H | -0.79572400 | 3.53906300  | -0.87678300 |
| N | 1.08374800  | 1.40564100  | 0.11491300  |
| H | -4.96579200 | 0.30851300  | 0.41863200  |
| H | -5.04513200 | -1.39751500 | 0.72131100  |
| S | -0.02445500 | -0.88548000 | -0.29843400 |
| F | 3.24899300  | -0.22900300 | 1.31270400  |
| F | 3.57856900  | 0.19202000  | -0.78735000 |
| F | 2.75714800  | -1.73034800 | -0.18187600 |

### 5S-a

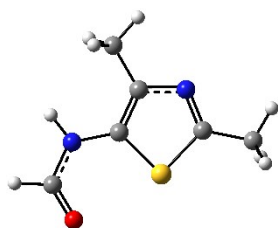

**Electronic Energy: -815.0782887 a.u.**

|   |             |            |             |
|---|-------------|------------|-------------|
| C | -0.49069700 | 0.37480600 | -0.00000800 |
| C | 0.48539100  | 1.33798900 | 0.00000800  |

|   |             |             |             |
|---|-------------|-------------|-------------|
| C | 0.00958300  | 2.58958500  | -0.14118400 |
| H | -0.57762800 | 3.24188000  | -0.79325300 |
| H | -0.04728500 | 3.00821300  | 0.86786800  |
| H | 1.05051400  | 2.61990800  | -0.46375400 |
| N | -1.87462000 | 1.02667200  | 0.19224400  |
| H | 1.23568800  | -0.01965700 | 1.66784100  |
| H | 2.86281100  | -0.37597200 | 2.17834200  |
| H | -4.23426400 | 0.15766200  | 0.73863600  |
| H | -4.09013400 | -1.18787100 | -0.41038100 |
| H | -3.61863000 | -1.41897000 | 1.27552000  |
| S | -0.97194600 | -1.30333400 | -0.38030500 |

### 4S-b

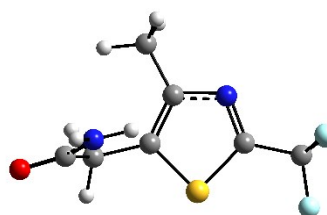

**Electronic Energy: -1151.709066 a.u.**

|   |             |             |             |
|---|-------------|-------------|-------------|
| C | 1.36297300  | 0.10908600  | 0.07621700  |
| C | -0.46893400 | 1.33041700  | 0.20769100  |
| C | -1.01785100 | 0.11744700  | 0.56539800  |
| C | -2.43727400 | -0.21255400 | 0.91960500  |
| H | -2.88720600 | 0.62071700  | 1.46552000  |
| H | -2.48555000 | -1.06729500 | 1.59740400  |
| C | -3.42215700 | -0.53721900 | -0.22496300 |
| O | -4.56065000 | -0.86938600 | 0.03305800  |
| N | -2.94434700 | -0.40789300 | -1.49075000 |
| C | 2.81379600  | -0.21180900 | -0.16377100 |
| C | -1.19251700 | 2.63956000  | 0.10062400  |
| H | -0.73029800 | 3.37862700  | 0.75997800  |
| H | -1.12591800 | 3.02874500  | -0.91901600 |
| H | -2.24654200 | 2.54891300  | 0.36277600  |
| N | 0.87741300  | 1.30149900  | -0.06511400 |
| H | -1.98565800 | -0.17007900 | -1.68086700 |
| H | -3.56167700 | -0.63022600 | -2.25543800 |
| S | 0.22024000  | -1.10273400 | 0.55735400  |
| F | 3.62024100  | 0.51660900  | 0.62382900  |
| F | 3.05702000  | -1.51705500 | 0.09172400  |
| F | 3.16991000  | 0.02540500  | -1.43847000 |

### 5S-b

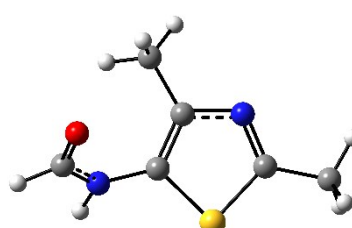

**Electronic Energy: -815.0763542 a.u.**

|   |            |             |            |
|---|------------|-------------|------------|
| C | 0.40337800 | -0.30775000 | 0.39469200 |
| C | 0.05127900 | 1.00620500  | 0.25302300 |

|   |             |             |             |
|---|-------------|-------------|-------------|
| C | 1.79927500  | -0.45540200 | 0.00001700  |
| S | 0.21623900  | -1.21600300 | -0.00002600 |
| N | 1.76921500  | 0.84396100  | 0.00001400  |
| N | -1.86930400 | 0.60827500  | 0.00001000  |
| H | -2.16392700 | 1.57413900  | -0.00017400 |
| C | -2.84361200 | -0.35288000 | -0.00002900 |
| H | -3.85583400 | 0.08691000  | -0.00010300 |
| O | -2.63450200 | -1.54626700 | -0.00000900 |
| C | 0.25189300  | 2.82192800  | 0.00006200  |
| C | 3.05843200  | -1.26650400 | 0.00001100  |
| H | 1.21620000  | 3.32894200  | -0.00073400 |
| H | -0.30213500 | 3.15411400  | -0.88544100 |
| H | -0.30074800 | 3.15425300  | 0.88638000  |
| H | 3.90603800  | -0.58098100 | 0.00022500  |
| H | 3.12646200  | -1.90838800 | 0.88301200  |
| H | 3.12665600  | -1.90806500 | -0.88321100 |

### 5S-c

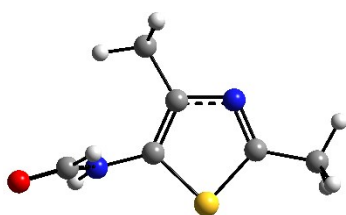

**Electronic Energy: -815.0763115 a.u.**

|   |             |             |             |
|---|-------------|-------------|-------------|
| C | 0.38141600  | -0.04965800 | -0.28151900 |
| C | -0.23281900 | 1.15693700  | -0.07849300 |
| C | -2.04050300 | -0.13248000 | 0.10146000  |
| S | -0.81034200 | -1.33889600 | -0.19368500 |
| N | -1.59099000 | 1.08698200  | 0.13751800  |
| N | 1.74171600  | -0.30972200 | -0.50877700 |
| H | 2.06879000  | -0.50803500 | -1.44700700 |
| C | 2.69047600  | -0.41904400 | 0.48628600  |
| H | 2.25724900  | -0.23629000 | 1.48644200  |
| O | 3.85275900  | -0.67481800 | 0.28807000  |
| C | 0.43578000  | 2.49643900  | -0.08410400 |
| C | -3.48062300 | -0.49711000 | 0.28856500  |
| H | 0.34806300  | 2.97187700  | 0.89697700  |
| H | 1.49222600  | 2.41334500  | -0.33938900 |
| H | -0.05334900 | 3.15448500  | -0.80700800 |
| H | -4.04477400 | 0.41767500  | 0.46974700  |
| H | -3.88559000 | -0.99234400 | -0.59814900 |
| H | -3.61665100 | -1.17116900 | 1.13843100  |

### 6S-b

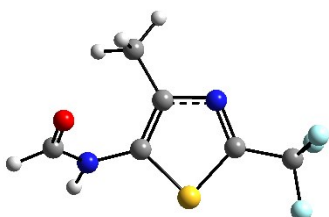

**Electronic Energy: -1112.468801 a.u.**

|   |            |             |             |
|---|------------|-------------|-------------|
| C | 1.30065600 | -0.32931300 | -0.40764900 |
|---|------------|-------------|-------------|

|   |             |             |             |
|---|-------------|-------------|-------------|
| C | -1.95245500 | 0.10664200  | -0.13296600 |
| S | -0.98756500 | -1.33487900 | 0.11988300  |
| N | -1.27824200 | 1.21236700  | -0.04485600 |
| N | 1.67503000  | -0.84663300 | 0.64864600  |
| H | 1.79468000  | -1.45206800 | 1.44883800  |
| C | 2.77052700  | -0.67400200 | -0.17123800 |
| H | 3.64884500  | -1.21887700 | 0.22460900  |
| O | 2.79815000  | -0.01301400 | -1.17934900 |
| C | 0.97499400  | 2.17716300  | 0.37443000  |
| C | -3.42231400 | 0.03576600  | -0.40857500 |
| H | 1.43042200  | 2.40677000  | -0.59312900 |
| H | 0.41773200  | 3.05051800  | 0.71533700  |
| H | 1.78606500  | 1.96990400  | 1.07544500  |
| H | -3.79350700 | 1.05204700  | -0.54069700 |
| H | -3.63481400 | -0.53780300 | -1.31474900 |
| H | -3.96354900 | -0.43260200 | 0.41828800  |

### 6S-a

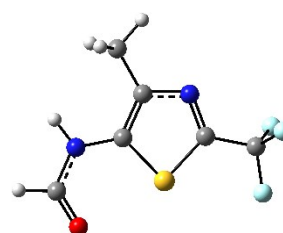

**Electronic Energy: -1112.472434 a.u.**

|   |             |             |             |
|---|-------------|-------------|-------------|
| C | 1.41254600  | 0.33772400  | -0.00001700 |
| C | 0.75406700  | 1.54354600  | 0.00004200  |
| C | -0.97373700 | 0.18812100  | -0.00007900 |
| S | 0.30141800  | -0.99154400 | -0.00006300 |
| N | -0.61189800 | 1.43150400  | 0.00000500  |
| N | 2.79659000  | 0.18848400  | -0.00005800 |
| H | 3.34677600  | 1.03720000  | 0.00007000  |
| C | 3.45083300  | -1.01457200 | -0.00007300 |
| H | 4.54938200  | -0.90408200 | 0.00006100  |
| O | 2.88353100  | -2.08421600 | -0.00000200 |
| C | 1.41959400  | 2.88647500  | 0.00009500  |
| C | -2.41459100 | -0.24489300 | -0.00000300 |
| H | 0.65008200  | 3.66305200  | 0.00098200  |
| H | 2.04814600  | 3.02519900  | 0.89090500  |
| H | 2.04686000  | 3.02593000  | -0.89150500 |
| F | -3.24054900 | 0.79874900  | -0.00087900 |
| F | -2.69717500 | -1.00166400 | -1.07876800 |
| F | -2.69753200 | -1.00010600 | 1.07976700  |

### 6S-c

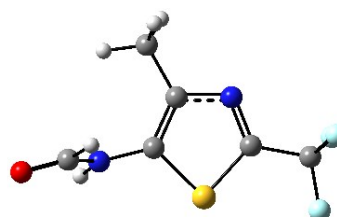

**Electronic Energy: -1112.46768 a.u.**

|   |             |             |             |
|---|-------------|-------------|-------------|
| C | -1.27611200 | -0.04600300 | -0.31334500 |
|---|-------------|-------------|-------------|



|   |             |             |             |
|---|-------------|-------------|-------------|
| C | 0.95223600  | 0.99735100  | -0.30188500 |
| C | -1.04463900 | 0.09262700  | -0.02109100 |
| S | -0.09743300 | -1.34890200 | -0.19744400 |
| N | -0.38500100 | 1.20611100  | -0.08259900 |
| N | 2.57758900  | -0.87846400 | -0.59007400 |
| H | 2.71965500  | -1.53574300 | -1.34431900 |
| C | 3.64615700  | -0.65423600 | 0.25793500  |
| H | 4.53920000  | -1.21474600 | -0.07489800 |
| O | 3.62978600  | 0.06124300  | 1.22697400  |
| C | 1.88845500  | 2.16008400  | -0.39734400 |
| C | -2.54021800 | 0.04052900  | 0.13935600  |
| H | 2.67585500  | 1.97168400  | -1.13058500 |
| H | 1.33325500  | 3.05224800  | -0.68646400 |
| H | 2.37534500  | 2.33740800  | 0.56523100  |
| F | -2.95421600 | -1.24028300 | 0.27667800  |
| F | -3.17510100 | 0.55606200  | -0.92879100 |
| F | -2.94698000 | 0.72264900  | 1.21957000  |

### 1Se-a

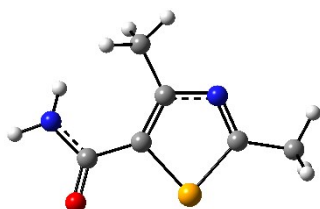

**Electronic Energy: -2817.5213201 a.u.**

|    |             |             |             |
|----|-------------|-------------|-------------|
| C  | 0.70488800  | 0.08674900  | -0.00524100 |
| C  | 0.25953100  | 1.38568100  | -0.04499700 |
| C  | -1.80040100 | 0.47703000  | 0.01313300  |
| N  | -1.10738500 | 1.57340100  | -0.02888600 |
| C  | 2.05029700  | -0.53263500 | -0.02100400 |
| O  | 2.19310400  | -1.72539600 | -0.24523400 |
| N  | 3.12545100  | 0.29063900  | 0.20982800  |
| H  | 3.01106700  | 1.16455100  | 0.69493300  |
| H  | 4.01116800  | -0.18144100 | 0.31420900  |
| C  | -3.29749200 | 0.45719700  | 0.04211800  |
| C  | 1.10112400  | 2.63107600  | -0.12867900 |
| H  | 0.49919300  | 3.43026400  | -0.56047000 |
| H  | 1.41709600  | 2.96770800  | 0.86641400  |
| H  | 1.99085200  | 2.48533000  | -0.74283800 |
| H  | -3.70494400 | -0.10338900 | -0.80355800 |
| H  | -3.67005700 | -0.00887700 | 0.95864000  |
| H  | -3.66086100 | 1.48398900  | -0.00493100 |
| Se | -0.75507300 | -1.10334800 | 0.02473200  |

### 2Se-a

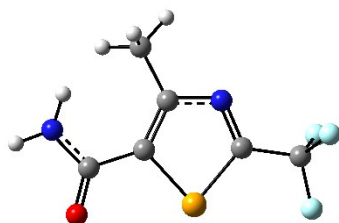

**Electronic Energy: -3114.9143790 a.u.**

|   |             |             |             |
|---|-------------|-------------|-------------|
| C | -0.77358300 | 1.22020100  | -0.12140500 |
| C | 1.11875100  | 0.08935200  | -0.01130400 |
| S | 0.02017200  | -1.22212900 | -0.26602700 |
| N | 0.58627600  | 1.26997900  | 0.05048000  |
| N | -2.61084700 | -0.43315400 | -0.48982000 |
| H | -2.93265300 | -0.73732900 | -1.40106800 |
| C | -3.54263600 | -0.50880600 | 0.52945100  |
| H | -3.11341000 | -0.20722500 | 1.50176700  |
| O | -4.68476300 | -0.85688900 | 0.37037300  |
| C | -1.56537500 | 2.49012100  | -0.09943700 |
| C | 2.60545000  | -0.13011400 | 0.10981100  |
| H | -1.13053000 | 3.20968900  | -0.79692000 |
| H | -2.60576900 | 2.31488600  | -0.37299700 |
| H | -1.53662100 | 2.94297400  | 0.89552000  |
| F | 3.27675100  | 0.47247500  | -0.88528500 |
| F | 3.08008800  | 0.34840600  | 1.26972900  |
| F | 2.89287000  | -1.44978100 | 0.05776700  |

### 1Se-b

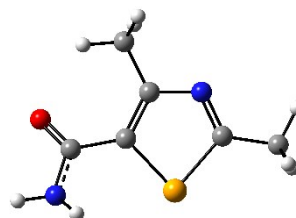

**Electronic Energy: -2817.5210352 a.u.**

|    |             |             |             |
|----|-------------|-------------|-------------|
| C  | 0.71395300  | 0.13472200  | 0.00385000  |
| C  | 0.20946300  | 1.40929200  | -0.06348500 |
| C  | -1.82310900 | 0.42630700  | -0.02840800 |
| N  | -1.16735800 | 1.53552500  | -0.08529500 |
| C  | 2.14372800  | -0.26968700 | 0.03621900  |
| O  | 3.03657900  | 0.48128600  | 0.39209100  |
| N  | 2.40022200  | -1.57216500 | -0.32842900 |
| H  | 1.76311600  | -2.06871800 | -0.93087600 |
| H  | 3.37709200  | -1.81580100 | -0.39796300 |
| C  | -3.31681900 | 0.33393900  | -0.02116900 |
| C  | 1.00265600  | 2.68009000  | -0.12394500 |
| H  | 2.06720700  | 2.48520300  | -0.21515500 |
| H  | 0.64816900  | 3.29121000  | -0.95822000 |
| H  | 0.83465900  | 3.25593500  | 0.79174600  |
| H  | -3.72658800 | 1.34252900  | -0.07847700 |
| H  | -3.68362300 | -0.24813300 | -0.87092200 |
| H  | -3.67994800 | -0.14529200 | 0.89212300  |
| Se | -0.70888200 | -1.11702100 | 0.07966800  |

### 2Se-b

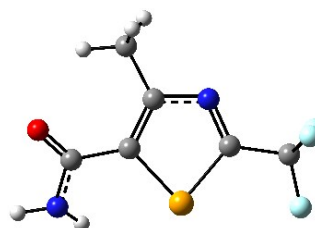

**Electronic Energy: -3114.9130323 a.u.**

|    |             |             |             |
|----|-------------|-------------|-------------|
| C  | 1.42104700  | 0.12269400  | 0.00602500  |
| C  | 0.87839800  | 1.38886400  | 0.04320500  |
| C  | -1.06741800 | 0.29946700  | 0.00332400  |
| N  | -0.49474100 | 1.45993800  | 0.03711700  |
| C  | 2.81179700  | -0.40047400 | 0.01109400  |
| O  | 3.02376500  | -1.58957300 | 0.19454700  |
| N  | 3.82482800  | 0.49792100  | -0.18086800 |
| H  | 3.65938800  | 1.40589600  | -0.57970500 |
| H  | 4.74940100  | 0.10499200  | -0.27283300 |
| C  | -2.56884100 | 0.16700000  | -0.01333700 |
| C  | 1.62385200  | 2.69459500  | 0.10786300  |
| H  | 0.94084400  | 3.46986900  | 0.45252500  |
| H  | 2.47442100  | 2.64597700  | 0.79030000  |
| H  | 1.98720200  | 2.99800700  | -0.88120000 |
| Se | 0.07552600  | -1.18628100 | -0.01385000 |
| F  | -3.13049300 | 0.73662200  | 1.06530300  |
| F  | -2.92838400 | -1.13690400 | -0.02246200 |
| F  | -3.10477600 | 0.74333800  | -1.10254400 |

|    |             |             |             |
|----|-------------|-------------|-------------|
| C  | 1.43074300  | 0.15819600  | 0.00258900  |
| C  | 0.86268700  | 1.41034800  | 0.07495400  |
| C  | -1.07717600 | 0.29845200  | 0.02286300  |
| N  | -0.51475300 | 1.45435500  | 0.09171200  |
| C  | 2.88481200  | -0.16901500 | -0.03905500 |
| O  | 3.71754800  | 0.61302600  | -0.46018100 |
| N  | 3.21762100  | -1.43145300 | 0.39116900  |
| H  | 2.62706700  | -1.92283400 | 1.04341100  |
| H  | 4.20683700  | -1.62768100 | 0.43684900  |
| C  | -2.57600000 | 0.13345600  | 0.00952100  |
| C  | 1.58982700  | 2.71899700  | 0.14336800  |
| H  | 1.19393100  | 3.31300400  | 0.97065600  |
| H  | 2.66157000  | 2.57851000  | 0.25046800  |
| H  | 1.40917700  | 3.28233600  | -0.77723100 |
| Se | 0.09242300  | -1.17219900 | -0.08989100 |
| F  | -2.90507200 | -1.17630600 | -0.07747700 |
| F  | -3.13597200 | 0.61973000  | 1.12858700  |
| F  | -3.13570900 | 0.76372100  | -1.03466700 |

### 3Se-a

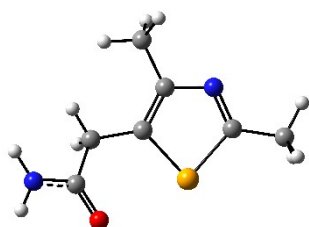

Electronic Energy: -2856.73836 a.u.

|    |             |             |             |
|----|-------------|-------------|-------------|
| C  | -2.16027900 | -0.09273300 | -0.13121700 |
| C  | -0.66313600 | 1.58207000  | -0.00431500 |
| C  | 0.27066300  | 0.60396000  | 0.18858200  |
| N  | -1.97789100 | 1.18482400  | -0.18847500 |
| C  | 1.72989400  | 0.78220100  | 0.48841600  |
| H  | 1.89641700  | 0.77248700  | 1.57520100  |
| H  | 2.05732500  | 1.76335200  | 0.13617300  |
| C  | 2.64389300  | -0.31220000 | -0.06916900 |
| N  | 3.87977600  | 0.11045300  | -0.45322100 |
| O  | 2.31160800  | -1.48229800 | -0.11598300 |
| C  | -0.41731000 | 3.06557900  | -0.01898100 |
| C  | -3.49591800 | -0.74501200 | -0.32335900 |
| H  | -0.88975300 | 3.53859300  | 0.84792700  |
| H  | 0.64291400  | 3.32148600  | -0.00526600 |
| H  | -0.86940300 | 3.50720200  | -0.91066800 |
| H  | -3.49962500 | -1.39379700 | -1.20408700 |
| H  | -3.76988600 | -1.35829900 | 0.53972100  |
| H  | -4.24781100 | 0.03350400  | -0.45765300 |
| H  | 4.53919100  | -0.57815900 | -0.78021300 |
| H  | 4.14962600  | 1.07858900  | -0.44316100 |
| Se | -0.56652700 | -1.09402100 | 0.15711800  |

### 4Se-a

### 3Se-b

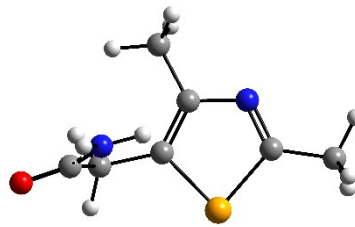

Electronic Energy: -2856.741616 a.u.

|    |             |             |             |
|----|-------------|-------------|-------------|
| C  | -2.16027900 | -0.09273300 | -0.13121700 |
| C  | -0.66313600 | 1.58207000  | -0.00431500 |
| C  | 0.27066300  | 0.60396000  | 0.18858200  |
| N  | -1.97789100 | 1.18482400  | -0.18847500 |
| C  | 1.72989400  | 0.78220100  | 0.48841600  |
| H  | 1.89641700  | 0.77248700  | 1.57520100  |
| H  | 2.05732500  | 1.76335200  | 0.13617300  |
| C  | 2.64389300  | -0.31220000 | -0.06916900 |
| N  | 3.87977600  | 0.11045300  | -0.45322100 |
| O  | 2.31160800  | -1.48229800 | -0.11598300 |
| C  | -0.41731000 | 3.06557900  | -0.01898100 |
| C  | -3.49591800 | -0.74501200 | -0.32335900 |
| H  | -0.88975300 | 3.53859300  | 0.84792700  |
| H  | 0.64291400  | 3.32148600  | -0.00526600 |
| H  | -0.86940300 | 3.50720200  | -0.91066800 |
| H  | -3.49962500 | -1.39379700 | -1.20408700 |
| H  | -3.76988600 | -1.35829900 | 0.53972100  |
| H  | -4.24781100 | 0.03350400  | -0.45765300 |
| H  | 4.53919100  | -0.57815900 | -0.78021300 |
| H  | 4.14962600  | 1.07858900  | -0.44316100 |
| Se | -0.56652700 | -1.09402100 | 0.15711800  |

### 4Se-b

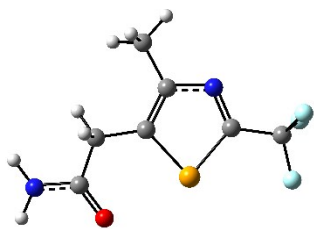

**Electronic Energy: -3154.134136 a.u.**

|    |             |             |             |
|----|-------------|-------------|-------------|
| C  | 1.40375200  | 0.25321200  | 0.00640000  |
| C  | -0.23103300 | 1.76367500  | 0.01057200  |
| C  | -1.06421600 | 0.67838900  | 0.11865900  |
| Se | -0.06521600 | -0.91866000 | 0.15330100  |
| C  | -2.55432400 | 0.73736400  | 0.26993300  |
| H  | -2.94944700 | 1.56218700  | -0.33167200 |
| H  | -2.81587200 | 0.97106300  | 1.31193400  |
| C  | -3.29819700 | -0.55362000 | -0.07400800 |
| O  | -2.76171900 | -1.64722200 | -0.05265500 |
| N  | -4.61661300 | -0.39417700 | -0.36188500 |
| C  | 2.82187700  | -0.23674400 | -0.08746000 |
| F  | 3.37313000  | 0.03463800  | -1.28645200 |
| F  | 3.61056500  | 0.31999400  | 0.84917000  |
| F  | 2.87472000  | -1.57942100 | 0.08288300  |
| C  | -0.67676800 | 3.20084600  | -0.01687300 |
| H  | -0.92845900 | 3.56260000  | 0.98613100  |
| H  | 0.13420800  | 3.81893900  | -0.40106800 |
| H  | -1.55572400 | 3.34809900  | -0.65060500 |
| N  | 1.12032300  | 1.51193600  | -0.06005100 |
| H  | -5.06192000 | 0.50703400  | -0.38631900 |
| H  | -5.16994100 | -1.21766200 | -0.53959400 |

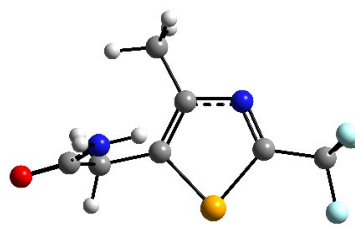

**Electronic Energy: -3154.134275 a.u.**

|    |             |             |             |
|----|-------------|-------------|-------------|
| C  | -1.37198800 | 0.27252300  | -0.03180700 |
| C  | 0.50945600  | 1.44218800  | -0.32145800 |
| C  | 1.10107200  | 0.21990500  | -0.53080000 |
| Se | -0.18613300 | -1.15270500 | -0.37613700 |
| C  | 2.53826700  | -0.08307300 | -0.83251500 |
| H  | 2.97368800  | 0.72588300  | -1.42525300 |
| H  | 2.63536900  | -0.97941600 | -1.44842900 |
| C  | 3.50592100  | -0.29462500 | 0.35315900  |
| O  | 4.65505700  | -0.62630200 | 0.14557100  |
| N  | 2.99977200  | -0.06963800 | 1.59399900  |
| C  | -2.83347400 | 0.05217500  | 0.25791800  |
| F  | -3.14954000 | -1.25671100 | 0.12625600  |
| F  | -3.15241100 | 0.41925000  | 1.51232800  |
| F  | -3.61747000 | 0.74813400  | -0.57948600 |
| C  | 1.20287400  | 2.77367600  | -0.36814300 |
| H  | 0.75646100  | 3.40222300  | -1.14332000 |
| H  | 1.07817600  | 3.29689900  | 0.58364300  |
| H  | 2.26952100  | 2.67766500  | -0.56812400 |
| N  | -0.84298500 | 1.44522800  | -0.05028300 |
| H  | 2.03404000  | 0.16958500  | 1.74294700  |
| H  | 3.60533100  | -0.21225300 | 2.38658800  |

### 5Se-a

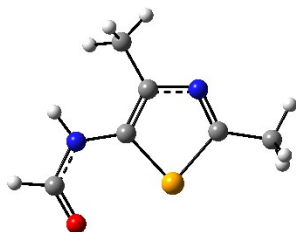

**Electronic Energy: -2817.505572 a.u.**

|   |             |             |             |
|---|-------------|-------------|-------------|
| C | 0.58406800  | 0.60473100  | -0.00096300 |
| C | -0.36340100 | 1.59068600  | 0.00678900  |
| C | -1.84299600 | -0.10825500 | -0.00103500 |
| N | -1.67943000 | 1.17309700  | 0.00536500  |
| N | 1.96598700  | 0.80684000  | -0.01427000 |
| H | 2.28943500  | 1.76315100  | -0.04762400 |
| C | 2.91121100  | -0.18132200 | -0.00071600 |
| H | 3.93649000  | 0.22485700  | -0.01686800 |
| O | 2.66628800  | -1.36924000 | 0.02374800  |
| C | -0.07567300 | 3.06707400  | 0.00516900  |
| C | -3.18346500 | -0.77654000 | 0.00275200  |
| H | -0.96905700 | 3.60191300  | 0.32707600  |
| H | 0.73821200  | 3.33273100  | 0.68852400  |
| H | 0.18913400  | 3.43415400  | -0.99334500 |
| H | -3.95470000 | -0.00535100 | 0.00891200  |
| H | -3.32173100 | -1.40540100 | -0.88162100 |
| H | -3.31363000 | -1.41140100 | 0.88408400  |

### 5Se-b

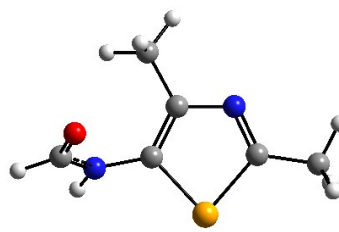

**Electronic Energy: -2817.501555 a.u.**

|   |             |             |             |
|---|-------------|-------------|-------------|
| C | -0.61549800 | -0.13941000 | 0.38479900  |
| C | -0.39043900 | 1.20192900  | 0.27674300  |
| C | 1.75142300  | 0.62691000  | -0.15113500 |
| N | 0.90424500  | 1.58804800  | -0.01617300 |
| N | -1.84309600 | -0.77854300 | 0.61635900  |
| H | -1.90996200 | -1.42946700 | 1.38644400  |
| C | -2.94693800 | -0.67785300 | -0.20553200 |
| H | -3.77471300 | -1.31040600 | 0.16840400  |
| O | -3.02996800 | 0.00879700  | -1.19322700 |
| C | -1.43586200 | 2.26317800  | 0.44058700  |
| C | 3.20880700  | 0.82187800  | -0.43093100 |
| H | -2.21681700 | 1.94462700  | 1.13370100  |
| H | -0.97322800 | 3.17799900  | 0.81272400  |
| H | -1.91696100 | 2.47665300  | -0.51818500 |
| H | 3.40381200  | 1.89203500  | -0.50761500 |
| H | 3.82707900  | 0.40501300  | 0.36906100  |
| H | 3.50457700  | 0.34027500  | -1.36687500 |

Se -0.20908300 -1.10642700 -0.00496400

### 5Se-c

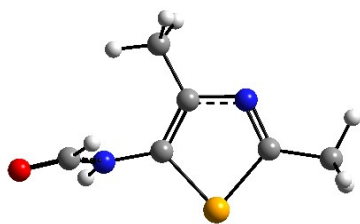

**Electronic Energy: -2817.501414 a.u.**

|    |             |             |             |
|----|-------------|-------------|-------------|
| C  | 0.58271900  | 0.14051800  | -0.26555800 |
| C  | 0.06314600  | 1.39337100  | -0.10612900 |
| C  | -1.92379500 | 0.35440400  | 0.14678200  |
| N  | -1.29721200 | 1.48224000  | 0.11913700  |
| N  | 1.92526700  | -0.20428100 | -0.47855700 |
| H  | 2.22825900  | -0.50397200 | -1.39788900 |
| C  | 2.87242200  | -0.30987600 | 0.51881900  |
| H  | 2.46206600  | -0.02729200 | 1.50501100  |
| O  | 4.01276800  | -0.65905000 | 0.33431300  |
| C  | 0.84713000  | 2.66991600  | -0.16906000 |
| C  | -3.40007900 | 0.22554100  | 0.35827800  |
| H  | 0.81997500  | 3.18223100  | 0.79706600  |
| H  | 1.88681000  | 2.48860900  | -0.44019500 |
| H  | 0.39936400  | 3.34369400  | -0.90411700 |
| H  | -3.82061200 | 1.22432700  | 0.47921200  |
| H  | -3.88166800 | -0.26259900 | -0.49340000 |
| H  | -3.62439300 | -0.36493300 | 1.25070300  |
| Se | -0.80051700 | -1.16460600 | -0.11334500 |

Se 0.98349800 -1.11216000 0.05822600

### 6Se-a

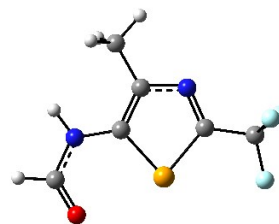

**Electronic Energy: -3114.900821 a.u.**

|    |             |             |             |
|----|-------------|-------------|-------------|
| C  | -1.39905200 | 0.55488000  | 0.00003700  |
| C  | -0.64470300 | 1.70437000  | -0.00003400 |
| C  | 1.07750900  | 0.28599700  | -0.00002700 |
| N  | 0.71440800  | 1.52529100  | -0.00006300 |
| N  | -2.79044300 | 0.50831400  | 0.00010800  |
| H  | -3.28473400 | 1.38956300  | 0.00018800  |
| C  | -3.52892000 | -0.64526600 | 0.00010700  |
| H  | -4.61343400 | -0.45301200 | -0.00001200 |
| O  | -3.04602100 | -1.75760800 | -0.00018800 |
| C  | -1.20600700 | 3.09952300  | -0.00005000 |
| C  | 2.52323700  | -0.11922100 | -0.00004800 |
| H  | -0.38132900 | 3.81092900  | -0.00110300 |
| H  | -1.82031000 | 3.29588800  | -0.88600600 |
| H  | -1.81862800 | 3.29656900  | 0.88692300  |
| Se | -0.32396900 | -0.98931000 | 0.00007800  |
| F  | 2.63237000  | -1.47023900 | -0.00019200 |
| F  | 3.17835800  | 0.33749400  | -1.08313100 |
| F  | 3.17831600  | 0.33724900  | 1.08317000  |

### 6Se-b

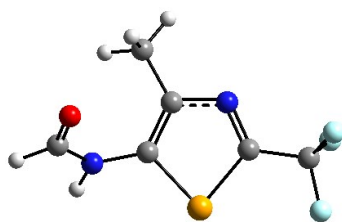

**Electronic Energy: -3114.894329 a.u.**

|    |             |             |             |
|----|-------------|-------------|-------------|
| C  | 1.37328000  | -0.15617000 | -0.38457400 |
| C  | 0.97924900  | 1.15711200  | -0.34223900 |
| C  | -1.06241900 | 0.30204400  | -0.01321800 |
| N  | -0.36338100 | 1.37528700  | -0.13689700 |
| N  | 2.67900300  | -0.64285200 | -0.53032400 |
| H  | 2.85961800  | -1.33307300 | -1.24594000 |
| C  | 3.72758200  | -0.33612300 | 0.31812200  |
| H  | 4.64728600  | -0.87134800 | 0.01734500  |
| O  | 3.67043100  | 0.41788700  | 1.25573900  |
| C  | 1.89121100  | 2.33513900  | -0.49981400 |
| C  | -2.55886700 | 0.32907700  | 0.15543900  |
| H  | 2.70608700  | 2.11210700  | -1.19168000 |
| H  | 1.32358400  | 3.18723000  | -0.87370300 |
| H  | 2.34165500  | 2.59962000  | 0.46052600  |
| Se | -0.09769100 | -1.31661400 | -0.10570200 |

### 6Se-c

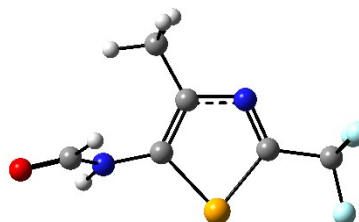

**Electronic Energy: -3114.893307 a.u.**

|    |             |             |             |
|----|-------------|-------------|-------------|
| C  | -1.33270200 | 0.09247500  | -0.29105200 |
| C  | -0.80022100 | 1.35148500  | -0.17268700 |
| C  | 1.15212300  | 0.27849100  | 0.01423800  |
| N  | 0.56367700  | 1.42380200  | -0.00336300 |
| N  | -2.68332700 | -0.24665200 | -0.42986200 |
| H  | -3.01227400 | -0.66159900 | -1.29363300 |
| C  | -3.62139500 | -0.16175800 | 0.58322700  |
| H  | -3.18604900 | 0.24255000  | 1.51428000  |
| O  | -4.77505100 | -0.48606800 | 0.45783500  |
| C  | -1.57675500 | 2.63270000  | -0.22974900 |
| C  | 2.64943800  | 0.15245300  | 0.14757100  |
| H  | -1.57251600 | 3.12853100  | 0.74521100  |
| H  | -1.10812300 | 3.31456800  | -0.94278200 |
| H  | -2.61055600 | 2.46082800  | -0.52828800 |
| Se | 0.03337200  | -1.22537300 | -0.16367000 |

|   |             |             |             |
|---|-------------|-------------|-------------|
| F | -2.92591600 | 1.05220500  | 1.22422000  |
| F | -3.17364000 | 0.85332200  | -0.91958400 |
| F | -3.03708200 | -0.92622500 | 0.32310500  |

### 7Se-a

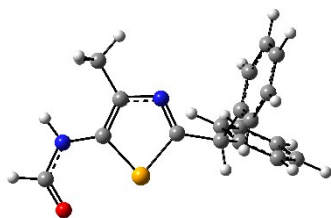

**Electronic Energy: - a.u.**

|    |             |             |             |
|----|-------------|-------------|-------------|
| C  | -2.69131200 | -0.46341700 | 0.46760500  |
| C  | -1.78111700 | -0.98283200 | 1.34786900  |
| C  | -0.26422700 | -0.25936400 | -0.13440000 |
| N  | -0.45397200 | -0.85449700 | 0.99758900  |
| N  | -4.07442000 | -0.50519300 | 0.63795600  |
| H  | -4.42078500 | -0.97214000 | 1.46842500  |
| C  | -4.98089300 | 0.03679700  | -0.23081500 |
| H  | -6.02686500 | -0.10875400 | 0.10799500  |
| O  | -4.68216900 | 0.61030200  | -1.25346600 |
| C  | -2.14526600 | -1.66909600 | 2.63290200  |
| C  | 1.10059000  | 0.07854000  | -0.69234300 |
| H  | -1.22557000 | -1.90549600 | 3.18008700  |
| H  | -2.77176200 | -1.03048000 | 3.27598300  |
| H  | -2.68548300 | -2.61304200 | 2.45521300  |
| H  | 0.99247500  | 0.18579200  | -1.78311900 |
| Se | -1.84239200 | 0.29377400  | -1.01545600 |
| C  | 1.62567400  | 1.41208800  | -0.16320700 |
| C  | 2.68970900  | 2.02559200  | -0.83558200 |
| C  | 1.10438600  | 2.02765700  | 0.97589500  |
| C  | 3.21917900  | 3.22945400  | -0.38116200 |
| H  | 3.11046000  | 1.54456000  | -1.72215200 |
| C  | 1.63614700  | 3.23479700  | 1.43341400  |
| H  | 0.27920500  | 1.56085000  | 1.51456300  |
| C  | 2.69184400  | 3.83979500  | 0.75805700  |
| H  | 4.04635800  | 3.69561300  | -0.91843800 |
| H  | 1.21664600  | 3.70314100  | 2.32487800  |
| H  | 3.10383500  | 4.78436300  | 1.11547500  |
| C  | 2.08008500  | -1.06064300 | -0.44899800 |
| C  | 2.35766500  | -1.97164400 | -1.46951800 |
| C  | 2.68992800  | -1.22966100 | 0.79774000  |
| C  | 3.23384500  | -3.03543600 | -1.25425900 |
| H  | 1.88160300  | -1.84833800 | -2.44527200 |
| C  | 3.56346400  | -2.29117300 | 1.01455300  |
| H  | 2.47560500  | -0.52041800 | 1.59841100  |
| C  | 3.83959800  | -3.19695800 | -0.01061100 |
| H  | 3.44340700  | -3.73760500 | -2.06245100 |
| H  | 4.03411000  | -2.41267600 | 1.99127600  |
| H  | 4.52840700  | -4.02525900 | 0.16072000  |

### 7Se-c

|   |            |             |             |
|---|------------|-------------|-------------|
| F | 3.01215100 | -1.14995400 | 0.18270200  |
| F | 3.28971200 | 0.72397200  | -0.88580500 |
| F | 3.09479500 | 0.73167300  | 1.27316900  |

### 7Se-b

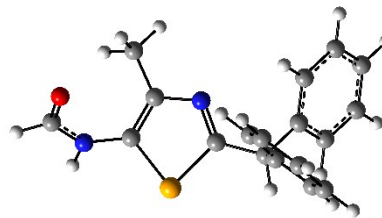

**Electronic Energy: - a.u.**

|    |             |             |             |
|----|-------------|-------------|-------------|
| C  | -2.75944600 | -0.46430700 | -0.30248500 |
| C  | -2.04514300 | -1.00245800 | 0.73054100  |
| C  | -0.24661300 | -0.24971800 | -0.38939400 |
| N  | -0.67200900 | -0.86314700 | 0.66123100  |
| N  | -4.15440900 | -0.43502800 | -0.42292400 |
| H  | -4.57342000 | -0.70445200 | -1.30562200 |
| C  | -4.98832300 | 0.08657600  | 0.54083400  |
| H  | -6.05107200 | 0.05248100  | 0.21522000  |
| O  | -4.63005000 | 0.51531800  | 1.60851900  |
| C  | -2.64747900 | -1.72084900 | 1.89564900  |
| C  | 1.20473400  | 0.04232100  | -0.69644500 |
| H  | -3.58036300 | -2.22074200 | 1.60099600  |
| H  | -1.93431000 | -2.46338500 | 2.27350900  |
| H  | -2.89617100 | -1.00970800 | 2.69641000  |
| H  | 1.29266000  | 0.12060000  | -1.79072800 |
| Se | -1.61309800 | 0.35779400  | -1.54727000 |
| C  | 2.11669500  | -1.09305300 | -0.25518200 |
| C  | 2.74335600  | -1.89351500 | -1.21110300 |
| C  | 2.34887800  | -1.34438400 | 1.10115600  |
| C  | 3.59321500  | -2.93068200 | -0.82456800 |
| H  | 2.56621900  | -1.70369200 | -2.27243400 |
| C  | 3.19250000  | -2.38067900 | 1.48781300  |
| H  | 1.86063800  | -0.72227300 | 1.85183400  |
| C  | 3.81882400  | -3.17659400 | 0.52677700  |
| H  | 4.07901600  | -3.54512500 | -1.58387600 |
| H  | 3.36562400  | -2.56854800 | 2.54831700  |
| H  | 4.48279600  | -3.98578700 | 0.83358100  |
| C  | 1.65966300  | 1.38047900  | -0.11732400 |
| C  | 2.76462500  | 2.00983900  | -0.70062900 |
| C  | 1.04931100  | 1.97225900  | 0.99026300  |
| C  | 3.25297400  | 3.20784100  | -0.18876700 |
| H  | 3.25174300  | 1.54514300  | -1.56138300 |
| C  | 1.54057100  | 3.17340000  | 1.50544100  |
| H  | 0.18579900  | 1.49465400  | 1.45631300  |
| C  | 2.64054900  | 3.79416400  | 0.91949500  |
| H  | 4.11399100  | 3.68692000  | -0.65672900 |
| H  | 1.05397100  | 3.62593500  | 2.37049500  |
| H  | 3.02020200  | 4.73381800  | 1.32255300  |

### TH-a



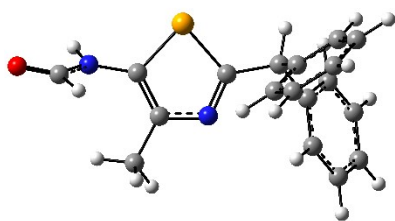

**Electronic Energy: - a.u.**

|    |             |             |             |
|----|-------------|-------------|-------------|
| C  | -2.70071700 | -0.47259700 | -0.10606900 |
| C  | -1.93369200 | -0.86391100 | 0.95687600  |
| C  | -0.19312900 | -0.22391800 | -0.31040100 |
| N  | -0.56814100 | -0.71059000 | 0.82541900  |
| N  | -4.09681700 | -0.48292600 | -0.17405500 |
| H  | -4.57371700 | -1.03694200 | -0.88081200 |
| C  | -4.90055600 | 0.32805900  | 0.59580500  |
| H  | -4.30165400 | 0.95340500  | 1.29460700  |
| O  | -6.10246400 | 0.34587400  | 0.52033900  |
| C  | -2.46555300 | -1.45218300 | 2.22712400  |
| C  | 1.24559300  | 0.05456600  | -0.68601100 |
| H  | -2.35537100 | -0.74247600 | 3.06063400  |
| H  | -3.52549600 | -1.71649200 | 2.12801300  |
| H  | -1.88788600 | -2.35081900 | 2.48173000  |
| H  | 1.28819100  | 0.11473400  | -1.78373900 |
| Se | -1.60400800 | 0.19706000  | -1.48758200 |
| C  | 2.15886100  | -1.08837900 | -0.26430800 |
| C  | 2.47502000  | -1.29971100 | 1.08166200  |
| C  | 2.68543100  | -1.94807300 | -1.22950400 |
| C  | 3.30279500  | -2.35567500 | 1.44994500  |
| H  | 2.06455900  | -0.63139900 | 1.83915100  |
| C  | 3.51829000  | -3.00542200 | -0.86147900 |
| H  | 2.44197700  | -1.78993900 | -2.28286300 |
| C  | 3.82781200  | -3.21157200 | 0.47997200  |
| H  | 3.54147400  | -2.51268400 | 2.50273800  |
| H  | 3.92464200  | -3.66838500 | -1.62646500 |
| H  | 4.47780600  | -4.03743300 | 0.77172000  |
| C  | 1.73002900  | 1.39947600  | -0.14747500 |
| C  | 2.78695000  | 2.03697400  | -0.80696400 |
| C  | 1.18987800  | 1.99388000  | 0.99476600  |
| C  | 3.29352400  | 3.24502700  | -0.33659600 |
| H  | 3.22105000  | 1.57337100  | -1.69622200 |
| C  | 1.69817000  | 3.20491100  | 1.46707900  |
| H  | 0.36910400  | 1.50747300  | 1.52297000  |
| C  | 2.74844700  | 3.83439800  | 0.80454300  |
| H  | 4.11596200  | 3.73026100  | -0.86384500 |
| H  | 1.26530700  | 3.65771800  | 2.36011400  |
| H  | 3.14182400  | 4.78209000  | 1.17403200  |

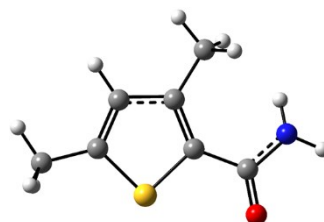

**Electronic Energy: -799.05271222 a.u.**

|   |             |             |             |
|---|-------------|-------------|-------------|
| C | -0.52047500 | -0.08776600 | -0.00091300 |
| C | -0.04444600 | 1.20957700  | -0.03946700 |
| C | 1.97514600  | 0.00973400  | 0.02115000  |
| S | 0.78411700  | -1.24271900 | 0.03260900  |
| C | -1.87998700 | -0.67334800 | -0.01547100 |
| O | -2.05792600 | -1.86581500 | -0.21180000 |
| N | -2.93638400 | 0.18879600  | 0.17691000  |
| H | -2.80226400 | 1.05769600  | 0.66637500  |
| H | -3.83129300 | -0.26340100 | 0.29239500  |
| C | 3.44182000  | -0.30008100 | 0.04861900  |
| C | -0.86791100 | 2.47023700  | -0.11387700 |
| H | -0.25548300 | 3.30126700  | -0.46777400 |
| H | -1.71560200 | 2.36360400  | -0.79347700 |
| H | -1.25701800 | 2.76038600  | 0.87011400  |
| H | 4.01892800  | 0.62644300  | 0.02957200  |
| H | 3.72141000  | -0.85247200 | 0.95045900  |
| H | 3.74414200  | -0.90322900 | -0.81237300 |
| C | 1.37961200  | 1.24353900  | -0.02433800 |
| H | 1.94685000  | 2.16680100  | -0.05523800 |

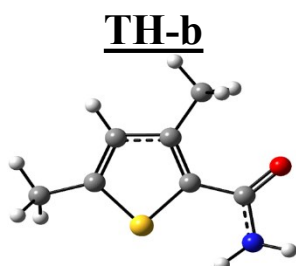

**Electronic Energy: -799.05383938 a.u.**

|   |             |             |             |
|---|-------------|-------------|-------------|
| C | -0.53194800 | -0.05213300 | 0.01838900  |
| C | -0.01358900 | 1.22462500  | -0.05214200 |
| C | 1.97989300  | -0.02995800 | -0.00268500 |
| S | 0.74732500  | -1.24494100 | 0.08896900  |

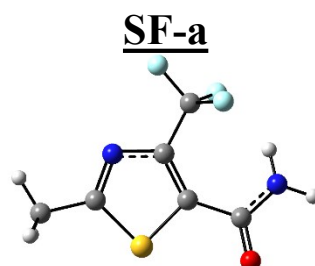

**Electronic Energy: -1112.49068651 a.u.**

|   |             |             |            |
|---|-------------|-------------|------------|
| C | -0.14851900 | 0.79036700  | 0.02730400 |
| C | 0.05809600  | -0.57171300 | 0.01443200 |
| C | -2.14520300 | -0.63336600 | 0.03544200 |
| S | -1.85642000 | 1.08118400  | 0.02606200 |

|   |             |             |             |   |             |             |             |
|---|-------------|-------------|-------------|---|-------------|-------------|-------------|
| C | -1.96426000 | -0.42540300 | 0.03656100  | N | -1.05804100 | -1.35684700 | 0.01973100  |
| O | -2.84608700 | 0.38819900  | 0.26566600  | C | 0.70898900  | 2.01842300  | -0.00938300 |
| N | -2.24923900 | -1.75315200 | -0.19107400 | O | 0.20862700  | 3.08666400  | -0.32508600 |
| H | -1.60351200 | -2.33907000 | -0.69603000 | N | 2.01729600  | 1.88418200  | 0.32268000  |
| H | -3.22932600 | -1.97662400 | -0.27378000 | H | 2.40325600  | 1.04393600  | 0.71929200  |
| C | 3.43540000  | -0.38631200 | 0.01704100  | H | 2.57507100  | 2.72332500  | 0.31213500  |
| C | -0.81673400 | 2.49497100  | -0.09731500 | C | -3.52417400 | -1.21465500 | 0.06041400  |
| H | -0.20394500 | 3.31940600  | -0.46887600 | C | 1.39165600  | -1.27137300 | -0.05922400 |
| H | -1.70268200 | 2.38780700  | -0.72219700 | H | -3.44418000 | -2.29779500 | -0.02601300 |
| H | -1.17735600 | 2.75766900  | 0.90147700  | H | -4.03844800 | -0.97372500 | 0.99488300  |
| H | 4.03875400  | 0.52165000  | -0.04035300 | H | -4.13405900 | -0.83571100 | -0.76337400 |
| H | 3.71084100  | -0.91523100 | 0.93418800  | F | 1.27326500  | -2.59550900 | -0.07822600 |
| H | 3.70888000  | -1.02611600 | -0.82712200 | F | 2.17763700  | -0.95630600 | 1.02060000  |
| C | 1.41278200  | 1.21366100  | -0.06862000 | F | 2.09489800  | -0.89815400 | -1.14948600 |
| H | 2.00525700  | 2.11933000  | -0.12601200 |   |             |             |             |

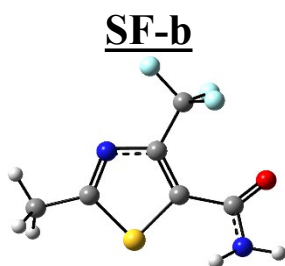

**Electronic Energy:** -1112.48586461 a.u.

|   |             |             |             |
|---|-------------|-------------|-------------|
| C | -0.11041900 | 0.79297400  | 0.02658900  |
| C | 0.04356900  | -0.56885300 | -0.02047200 |
| C | -2.16588800 | -0.56220600 | 0.03307500  |
| S | -1.80906200 | 1.15253500  | 0.07452200  |
| N | -1.10452000 | -1.31064800 | -0.01632000 |
| C | 0.93456900  | 1.86421700  | 0.12935700  |
| O | 1.91393500  | 1.73773400  | 0.83153000  |
| N | 0.65498800  | 3.00218500  | -0.58163600 |
| H | 0.01791800  | 2.97931600  | -1.36157700 |
| H | 1.36977800  | 3.71465300  | -0.58449400 |
| C | -3.56679100 | -1.08615600 | 0.07130000  |
| C | 1.35962100  | -1.31008900 | -0.08256200 |
| H | -3.52777000 | -2.17327500 | 0.00998400  |
| H | -4.07130500 | -0.80347300 | 0.99910000  |
| H | -4.16107500 | -0.70517500 | -0.76318800 |
| F | 2.27482700  | -0.63493900 | -0.80631800 |
| F | 1.87547000  | -1.51496400 | 1.14301000  |
| F | 1.20356100  | -2.51393800 | -0.65918700 |
